# Supplementary material
Source: publisher figshare collection journal article supplement (https://gsajournals.figshare.com/ndownloader/files/18059198)
Supplement: Supplementary file 1 [file 18059198]

**Table S3. Mapping rates for liver infection time-course RNA-seq**

| Individual | Week | Numb of reads | % reads mapped |
| --- | --- | --- | --- |
| 1001 | 1 | 41586900 | 93.123 |
| 1001 | 3 | 75597566 | 92.85 |
| 1001 | 4 | 56464632 | 92.382 |
| 1001 | 8 | 71336064 | 92.559 |
| 1001 | 12 | 56542630 | 92.376 |
| 1001 | 16 | 72239324 | 91.58 |
| 1001 | 24 | 48708288 | 92.424 |
| 1005 | 1 | 55271724 | 92.269 |
| 1005 | 3 | 59872864 | 92.886 |
| 1005 | 4 | 20907584 | 92.583 |
| 1005 | 4 | 49920728 | 92.538 |
| 1005 | 8 | 50457426 | 93.009 |
| 1005 | 12 | 42700192 | 93.166 |
| 1005 | 12 | 44360722 | 93.408 |
| 1005 | 16 | 26990790 | 91.626 |
| 1005 | 16 | 58940660 | 91.461 |
| 1005 | 20 | 23473546 | 90.28 |
| 1005 | 24 | 63100614 | 91.771 |
| 1008 | 1 | 72619384 | 92.935 |
| 1008 | 3 | 53251828 | 93.224 |
| 1008 | 4 | 42002154 | 92.865 |
| 1008 | 4 | 55685944 | 92.631 |
| 1008 | 8 | 58069234 | 92.931 |
| 1008 | 12 | 40860302 | 91.706 |
| 1008 | 12 | 46237666 | 90.832 |
| 1008 | 16 | 47486488 | 83.073 |
| 1008 | 16 | 75353994 | 92.819 |
| 1008 | 20 | 51207898 | 92.496 |
| 1008 | 24 | 54834826 | 93.166 |
| 1008 | 24 | 69102274 | 93.031 |
| 1009 | 1 | 52923130 | 92.507 |
| 1009 | 3 | 54520052 | 92.847 |
| 1009 | 4 | 45144038 | 92.773 |
| 1009 | 8 | 36018686 | 92.911 |
| 1009 | 24 | 47414582 | 93.339 |
| 1009 | 24 | 9625204 | 92.78 |
| 1010 | 1 | 59373116 | 92.05 |
| 1010 | 3 | 95614362 | 93.278 |
| 1010 | 4 | 182970362 | 90.568 |
| 1010 | 8 | 21701548 | 92.171 |
| 1010 | 8 | 44380454 | 92.146 |
| 1010 | 18(Euth) | 30170170 | 92.758 |
| 1011 | 1 | 66250992 | 92.436 |
| 1011 | 3 | 58762340 | 91.836 |
| 1011 | 4 | 56621966 | 91.328 |
| 1011 | 8 | 38755814 | 92.6 |
| 1011 | 8 | 59888808 | 92.456 |
| 1011 | 12 | 44914860 | 91.639 |
| 1011 | 16 | 47331364 | 92.781 |
| 1011 | 20 | 61981164 | 92.085 |
| 1011 | 24 | 72398264 | 92.447 |
| 1015 | 1 | 51653398 | 93.566 |
| 1015 | 3 | 73915700 | 93.802 |
| 1015 | 4 | 59836076 | 93.845 |
| 1015 | 8 | 64670974 | 93.958 |
| 1015 | 12 | 59859008 | 93.872 |
| 1015 | 16 | 16195442 | 93.12 |
| 1015 | 24 | 53473788 | 93.386 |
| 1016 | 1 | 21267530 | 93.658 |
| 1016 | 3 | 47201538 | 94.417 |
| 1016 | 4 | 78657924 | 93.442 |
| 1016 | 8 | 152140000 | 93.205 |
| 1016 | 12 | 54596720 | 93.705 |
| 1016 | 16 | 63350872 | 93.313 |
| 1016 | 20 | 47345042 | 93.312 |
| 1016 | 24 | 101425488 | 93.475 |
| 1017 | 1 | 53933192 | 94.343 |
| 1017 | 3 | 64727638 | 94.001 |
| 1017 | 4 | 94504180 | 93.67 |
| 1017 | 8 | 60542364 | 93.961 |
| 1017 | 12 | 73095420 | 93.982 |
| 1017 | 16 | 60870854 | 92.629 |
| 1017 | 18(Euth) | 109705408 | 93.171 |
| 1019 | 1 | 73629970 | 92.829 |
| 1019 | 3 | 56845878 | 92.712 |
| 1019 | 4 | 45045096 | 92.678 |
| 1019 | 8 | 56365822 | 92.796 |
| 1019 | 12 | 60836102 | 93.006 |
| 1019 | 16 | 74979176 | 92.684 |
| 1019 | 20 | 55086642 | 87.562 |
| 1019 | 24 | 41638694 | 92.975 |
| 1019 | 24 | 44226674 | 93.081 |
| 1021 | 1 | 59154248 | 92.864 |
| 1021 | 3 | 116620000 | 92.258 |
| 1021 | 4 | 32155312 | 93.907 |
| 1021 | 8 | 33096738 | 93.623 |
| 1021 | 8 | 62907084 | 93.546 |
| 1021 | 12 | 63400172 | 92.252 |
| 1021 | 16 | 108040102 | 93.715 |
| 1021 | 24 | 66534142 | 91.271 |
